# Supplementary material
Source: publisher figshare collection journal article supplement (https://tandf.figshare.com/ndownloader/files/15541880)
Supplement: Supplementary file 1 [file 15541880]

## Supplemental Materials of: fast two-stage estimator for clustered count data with overdispersion

### ARTICLE HISTORY

Compiled January 9, 2019

### Appendix A. Variance of $\tilde{\mathbf{D}}$

To find an expression for  $V(\tilde{\mathbf{D}})$ , the delta method is applied. First, defining:

$$h(\mathbf{D}) = \sum_{i=1}^N (\mathbf{I} - \mathbf{H}_{ii}) V(\hat{\beta}_i) (\mathbf{I} - \mathbf{H}_{ii})' + \sum_{k \neq i} \mathbf{H}_{ik} V(\hat{\beta}_i) \mathbf{H}_{ik}', \quad (\text{A1})$$

the variance of  $\tilde{\mathbf{D}}$  equals:

$$V(\tilde{\mathbf{D}}) = \left[ h'(\tilde{\mathbf{D}})^{-1} \right]' V(\text{vec } \mathbf{S}_b) \left[ h'(\tilde{\mathbf{D}})^{-1} \right],$$

where  $h'(\tilde{\mathbf{D}})$  is the derivative of  $h(\mathbf{D})$  with respect to  $\mathbf{D}$  evaluated at  $\tilde{\mathbf{D}}$  and  $\text{vec}$  is the vec-operator.  $\text{vec } \mathbf{A}$  vectorizes a matrix  $\mathbf{A}$  by stacking its columns.

Assuming that asymptotically  $\tilde{\mathbf{b}}_i$  follows a normal distribution, and using some results of Theorem 4.3 by [1], the variance of  $\text{vec } \mathbf{S}_b$  is:

$$\begin{aligned} V(\text{vec } \mathbf{S}_b) &= V\left(\sum_{i=1}^N \text{vec } \tilde{\mathbf{b}}_i \tilde{\mathbf{b}}_i'\right) = \sum_{i=1}^N V(\tilde{\mathbf{b}}_i \tilde{\mathbf{b}}_i') + \sum_{j \neq i} \text{Cov}(\tilde{\mathbf{b}}_i \tilde{\mathbf{b}}_i', \tilde{\mathbf{b}}_j \tilde{\mathbf{b}}_j') \\ &= \sum_{i=1}^N V(\tilde{\mathbf{b}}_i^{\otimes 2}) + \sum_{j \neq i} \text{Cov}(\tilde{\mathbf{b}}_i^{\otimes 2}, \tilde{\mathbf{b}}_j^{\otimes 2}) \\ &= (\mathbf{I} + \mathbf{C}_{qq}) \left[ \sum_{i=1}^N V(\tilde{\mathbf{b}}_i)^{\otimes 2} + 2 \sum_{j > i} \text{Cov}(\tilde{\mathbf{b}}_i, \tilde{\mathbf{b}}_j)^{\otimes 2} \right], \end{aligned} \quad (\text{A2})$$

where

$$\begin{aligned} \text{Cov}(\tilde{\mathbf{b}}_i, \tilde{\mathbf{b}}_j) &= E(\tilde{\mathbf{b}}_i \tilde{\mathbf{b}}_j') = E\left[(\hat{\beta}_i - \mathbf{K}_i \tilde{\beta})(\hat{\beta}_j - \mathbf{K}_j \tilde{\beta})'\right] \\ &= \mathbf{K}_i V(\tilde{\beta}) \mathbf{K}_j' - V(\hat{\beta}_i) \mathbf{H}_{ji}' - \mathbf{H}_{ij} V(\hat{\beta}_j), \end{aligned}$$

and  $\mathbf{C}_{pq}$  is the commutation matrix for an arbitrary  $(p \times q)$  matrix  $\mathbf{A}$ , i.e., the matrix which, for any  $(p \times q)$  matrix  $\mathbf{A}$ , transforms  $\text{vec } \mathbf{A}$  into  $\text{vec } \mathbf{A}'$ .

## Appendix B. Random intercept model

Here, the model is expressed as:

$$\mathbf{Y}_i|b_i \sim \text{Poisson}(\boldsymbol{\mu}_i^c), \quad (\text{B1})$$

where  $\boldsymbol{\mu}_i^c = \exp(\mathbf{X}_i\boldsymbol{\beta} + \mathbf{1}_{n_i}b_i)$  and  $b_i \sim N(0, d)$ . Then, the conditional variance of  $\mathbf{Y}_i$  is reduced to,

$$V(\mathbf{Y}_i|b_i) = \exp(b_i)\mathbf{R}_i, \quad (\text{B2})$$

where  $\mathbf{R}_i$  is a  $(n_i \times n_i)$  diagonal matrix with the vector  $\exp(\mathbf{X}_i\boldsymbol{\beta})$  at the diagonal.

Using the IRLS estimator for  $\boldsymbol{\beta}_i$ , the conditional mean and variance of  $\hat{\boldsymbol{\beta}}_i$  are

$$E(\hat{\boldsymbol{\beta}}_i|b_i) = \mathbf{K}_i\boldsymbol{\beta} + b_i\mathbf{c} \quad \text{and} \quad V(\hat{\boldsymbol{\beta}}_i|b_i) = \exp(-b_i) (\mathbf{T}_i'\mathbf{R}_i\mathbf{T}_i)^{-1}, \quad (\text{B3})$$

where  $\mathbf{c}$  is a  $q$ -dimensional single-entry vector with first entry equals to 1 and zero elsewhere. Then, the marginal variance of  $\hat{\boldsymbol{\beta}}_i$  is reduced to,

$$V(\hat{\boldsymbol{\beta}}_i) = d\mathbf{C} + \exp\left(\frac{d}{2}\right) (\mathbf{T}_i'\mathbf{R}_i\mathbf{T}_i)^{-1}, \quad (\text{B4})$$

where  $\mathbf{C}$  is a  $(q \times q)$  single-entry matrix with entry  $(1, 1)$  equals to 1 and zero elsewhere. The variance of  $\tilde{\mathbf{b}}$  is,

$$\begin{aligned} V(\tilde{\mathbf{b}}_i) &= (\mathbf{I} - \mathbf{H}_{ii})V(\hat{\mathbf{b}}_i)(\mathbf{I} - \mathbf{H}_{ii})' + \sum_{k \neq i} \mathbf{H}_{ik}V(\hat{\boldsymbol{\beta}}_k)\mathbf{H}_{ik}' \\ &= d \left[ (\mathbf{I} - \mathbf{H}_{ii})\mathbf{C}(\mathbf{I} - \mathbf{H}_{ii})' + \sum_{k \neq i} \mathbf{H}_{ik}\mathbf{C}\mathbf{H}_{ik}' \right] + \\ &\quad \exp\left(\frac{d}{2}\right) \left[ (\mathbf{I} - \mathbf{H}_{ii}) (\mathbf{T}_i'\mathbf{R}_i\mathbf{T}_i)^{-1} (\mathbf{I} - \mathbf{H}_{ii})' + \sum_{k \neq i} \mathbf{H}_{ik} (\mathbf{T}_i'\mathbf{R}_i\mathbf{T}_i)^{-1} \mathbf{H}_{ik}' \right]. \end{aligned} \quad (\text{B5})$$

Then, the estimator of  $d$  is based on:

$$s_b = \sum_{i=1}^N (\hat{\boldsymbol{\beta}} - \mathbf{K}_i\tilde{\boldsymbol{\beta}})'(\hat{\boldsymbol{\beta}} - \mathbf{K}_i\tilde{\boldsymbol{\beta}}) = \sum_{i=1}^N \tilde{\mathbf{b}}_i'\tilde{\mathbf{b}}_i. \quad (\text{B6})$$

A unbiased method-of-moments estimator of  $d$  can be found by equating  $s_b$  with its

expected value and solving for  $d$ . Given that  $E(\tilde{\mathbf{b}}_i) = \mathbf{0}$ ,

$$E(s_b) = \sum_{i=1}^N \text{tr } V(\tilde{\mathbf{b}}_i) = d \sum_{i=1}^N \text{tr} \left[ (\mathbf{I} - \mathbf{H}_{ii}) \mathbf{C} (\mathbf{I} - \mathbf{H}_{ii})' + \sum_{k \neq i} \mathbf{H}_{ik} \mathbf{C} \mathbf{H}_{ik}' \right] + \exp\left(\frac{d}{2}\right) \sum_{i=1}^N \text{tr} \left[ (\mathbf{I} - \mathbf{H}_{ii}) \mathbf{C}_{2i} (\mathbf{I} - \mathbf{H}_{ii})' + \sum_{k \neq i} \mathbf{H}_{ik} \mathbf{C}_{2k} \mathbf{H}_{ik}' \right]. \quad (\text{B7})$$

As before (B7) is non-linear and an iterative procedure is needed to find the solution for  $d$ .

Furthermore, assuming that  $\tilde{\mathbf{b}}_i$  follows a normal distribution, the variance of  $s_b$  is:

$$V(s_b) = \sum_{i=1}^N \text{tr} \left[ V(\tilde{\mathbf{b}}_i) V(\tilde{\mathbf{b}}_i) \right]. \quad (\text{B8})$$

Then, an expression of  $V(\tilde{d})$  can be found using the delta method, as in Section A.

### Appendix C. More results of the simulation study

In this section, we compare the cluster-by-cluster estimator of the Poisson-Normal model with different weighting schemes and the coverage is evaluated. For the Poisson-Normal-Gamma model, the results are fairly the same.

#### *Weighting scheme comparison*

Table C1 displays the MSE ratio of the cluster-by-cluster estimator using proportional over iterated optimal weights. For all parameters, the use of the latter reduces the MSE, but by a small (around 5% for fixed effects) or insignificant (less than 1% for variance components) quantity.

**Table C1.** MSE ratio of the cluster-by-cluster estimator using proportional weights over iterated optimal weights.

| $\mu_n$ | (a) Fixing $N = 50$ |           |           |           |          |          |          | $N$ | (b) Fixing $\mu_n = 50$ |           |           |           |          |          |          |
|---------|---------------------|-----------|-----------|-----------|----------|----------|----------|-----|-------------------------|-----------|-----------|-----------|----------|----------|----------|
|         | $\beta_0$           | $\beta_1$ | $\beta_2$ | $\beta_3$ | $d_{00}$ | $d_{01}$ | $d_{11}$ |     | $\beta_0$               | $\beta_1$ | $\beta_2$ | $\beta_3$ | $d_{00}$ | $d_{01}$ | $d_{11}$ |
| 20      | 1.02                | 1.04      | 1.03      | 1.01      | 1.00     | 1.00     | 1.00     | 20  | 1.02                    | 1.02      | 1.02      | 1.00      | 1.01     | 1.01     | 1.00     |
| 50      | 1.02                | 1.05      | 1.04      | 1.06      | 1.00     | 1.00     | 1.00     | 50  | 1.02                    | 1.05      | 1.04      | 1.06      | 1.00     | 1.00     | 1.00     |
| 100     | 1.05                | 1.05      | 1.04      | 1.04      | 1.00     | 1.00     | 1.00     | 100 | 1.04                    | 1.06      | 1.02      | 1.02      | 1.00     | 1.00     | 1.00     |
| 150     | 1.06                | 1.06      | 1.06      | 1.06      | 1.00     | 1.00     | 1.00     | 150 | 1.03                    | 1.04      | 1.07      | 1.05      | 1.00     | 1.00     | 1.00     |
| 200     | 1.07                | 1.05      | 1.07      | 1.07      | 1.00     | 1.00     | 1.00     | 200 | 1.07                    | 1.06      | 1.03      | 1.05      | 1.00     | 1.00     | 1.00     |
| 250     | 1.07                | 1.04      | 1.06      | 1.05      | 1.00     | 1.00     | 1.00     | 250 | 1.05                    | 1.05      | 1.05      | 1.05      | 1.00     | 1.00     | 1.00     |
| 400     | 1.05                | 1.08      | 1.05      | 1.06      | 1.00     | 1.00     | 1.00     | 400 | 1.06                    | 1.07      | 1.04      | 1.03      | 1.00     | 1.00     | 1.00     |

Table C2 exhibits the MSE ratio of the method-of-moments estimator of  $D$  without weighting over with proportional weights. For both models, the use of proportional weights reduces the MSE by roughly 14% when the number of elements per cluster is small ( $\mu_n = 20$ ). However, when the number of elements per cluster increases the unweighted estimators is lightly more efficient (by around 5% when  $\mu_n = 250$ ).

**Table C2.** MSE ratio of the method-of-moments estimator of  $\mathbf{D}$  without any weights over proportional weights

| $\mu_n$ | (a) Fixing $N = 50$ |          |          | $N$ | (b) Fixing $\mu_n = 50$ |          |          |
|---------|---------------------|----------|----------|-----|-------------------------|----------|----------|
|         | $d_{00}$            | $d_{01}$ | $d_{11}$ |     | $d_{00}$                | $d_{01}$ | $d_{11}$ |
| 20      | 1.10                | 1.17     | 1.15     | 20  | 0.98                    | 0.99     | 1.00     |
| 50      | 1.01                | 1.02     | 1.00     | 50  | 1.01                    | 1.02     | 1.00     |
| 100     | 0.96                | 0.99     | 0.98     | 100 | 0.99                    | 1.01     | 1.02     |
| 150     | 0.96                | 0.96     | 0.94     | 150 | 1.02                    | 1.02     | 1.01     |
| 250     | 0.95                | 0.95     | 0.95     | 250 | 1.00                    | 1.01     | 1.07     |

### *Coverage of the 95% confidence interval*

Table C3 displays the coverage of the 95% confidence interval of the parameter associated with the treatment effect ( $\beta_3$ ) using the CbC and full ML estimator for the PN and PNG model in all simulation scenarios. Both estimators provide fairly the same results, the coverage is close to 0.95 in all scenarios.

**Table C3.** Coverage of the 95% confidence interval of the parameter associated with the treatment effect using the cluster-by-cluster (CbC) and full maximum likelihood (ML) estimator for the (a) PN model and (b) PNG model

| (a) Poisson-Normal model       |                                     |       |       |       |       |                                     |       |       |       |       |
|--------------------------------|-------------------------------------|-------|-------|-------|-------|-------------------------------------|-------|-------|-------|-------|
| Method                         | Fixing $\mu_n = 50$ and varying $N$ |       |       |       |       | Fixing $N = 50$ and varying $\mu_n$ |       |       |       |       |
|                                | 20                                  | 50    | 100   | 150   | 250   | 20                                  | 50    | 100   | 150   | 250   |
| CbC                            | 0.928                               | 0.938 | 0.945 | 0.955 | 0.951 | 0.938                               | 0.938 | 0.938 | 0.934 | 0.933 |
| ML                             | 0.932                               | 0.941 | 0.947 | 0.953 | 0.951 | 0.942                               | 0.941 | 0.941 | 0.933 | 0.935 |
| (b) Poisson-Normal-Gamma model |                                     |       |       |       |       |                                     |       |       |       |       |
| Method                         | Fixing $\mu_n = 50$ and varying $N$ |       |       |       |       | Fixing $N = 50$ and varying $\mu_n$ |       |       |       |       |
|                                | 20                                  | 50    | 100   | 150   | 250   | 20                                  | 50    | 100   | 150   | 250   |
| CbC                            | 0.927                               | 0.944 | 0.964 | 0.950 | 0.957 | 0.938                               | 0.944 | 0.941 | 0.940 | 0.935 |
| ML                             | 0.936                               | 0.948 | 0.965 | 0.951 | 0.955 | 0.935                               | 0.948 | 0.944 | 0.943 | 0.938 |

## References

- [1] Magnus JR, Neudecker H. The commutation matrix: Some properties and applications. The Annals of Statistics. 1979;7(2):381–394.
